# Supplementary material for: Exercise and Caloric Restriction Exert Different Benefits on Skeletal Muscle Metabolism in Aging Condition
Source: MDPI journal article supplement (doi:10.3390/nu15235004), 2023-12-03

**Supplementary Table S1: The levels of skeletal muscle metabolomes**

| Metabolomes                                            | Young adult            | Natural aging           | D-gal                       | D-gal with EX                      | D-gal with CR                      |
|--------------------------------------------------------|------------------------|-------------------------|-----------------------------|------------------------------------|------------------------------------|
| <b><u>Amino acids</u></b>                              |                        |                         |                             |                                    |                                    |
| Alanine (peak area/mg)                                 | 693071.87 ± 27836.05   | 689537.12 ± 73839.43    | 740866.21 ± 13470.01        | 698189.43 ± 50259.68               | 719349.48 ± 22088.64               |
| Arginine (nmol/mg)                                     | 724.72 ± 47.69         | 1262.00 ± 175.55*       | 1255.21 ± 136.21*           | 504.41 ± 73.56 <sup>†‡</sup>       | 1023.18 ± 133.34 <sup>§</sup>      |
| Asparagine (peak area/mg)                              | 13435.81 ± 562.76      | 8182.03 ± 451.21*       | 7955.11 ± 378.68*           | 7009.79 ± 439.44*                  | 11246.39 ± 397.95 <sup>*†‡§</sup>  |
| Aspartate (nmol/mg)                                    | 737.36 ± 66.94         | 458.34 ± 99.43*         | 469.05 ± 34.19*             | 497.69 ± 36.29*                    | 509.09 ± 87.62*                    |
| Glutamate (nmol/mg)                                    | 432.69 ± 42.47         | 477.76 ± 71.36          | 425.91 ± 72.08              | 472.89 ± 13.43                     | 414.83 ± 61.68                     |
| Glutamine (peak area/mg)                               | 416546.37 ± 31869.25   | 558066.25 ± 54031.10*   | 526701.75 ± 29095.84*       | 399601.11 ± 29236.27 <sup>†‡</sup> | 552417.08 ± 18079.95 <sup>*§</sup> |
| Glycine (nmol/mg)                                      | 312.59 ± 30.14         | 443.79 ± 37.04*         | 291.87 ± 17.95 <sup>†</sup> | 290.13 ± 14.10 <sup>†</sup>        | 335.11 ± 26.78 <sup>†</sup>        |
| Histidine (μmol/mg)                                    | 3.86 ± 0.31            | 5.61 ± 0.08*            | 6.02 ± 0.46*                | 5.64 ± 0.59*                       | 4.12 ± 0.29 <sup>†‡§</sup>         |
| Isoleucine and Leucine (nmol/mg)                       | 418.61 ± 30.55         | 278.99 ± 20.28*         | 308.79 ± 14.50*             | 304.62 ± 26.33*                    | 292.13 ± 25.05*                    |
| Lysine (μmol/mg)                                       | 2.38 ± 0.19            | 2.52 ± 0.55             | 2.34 ± 0.10                 | 1.94 ± 0.37                        | 2.49 ± 0.37                        |
| Methionine (nmol/mg)                                   | 228.38 ± 8.35          | 273.57 ± 18.68*         | 280.20 ± 7.07*              | 216.58 ± 18.56 <sup>†‡</sup>       | 225.16 ± 9.04 <sup>†‡</sup>        |
| Phenylalanine (nmol/mg)                                | 233.31 ± 10.04         | 287.59 ± 24.27*         | 283.60 ± 12.72*             | 209.48 ± 15.63 <sup>†‡</sup>       | 207.34 ± 10.55 <sup>†‡</sup>       |
| Proline (nmol/mg)                                      | 750.33 ± 52.77         | 1244.35 ± 45.25*        | 1208.77 ± 36.66*            | 1007.39 ± 77.38 <sup>*†‡</sup>     | 1000.73 ± 45.32 <sup>*†‡</sup>     |
| Serine (μmol/mg)                                       | 2.18 ± 0.31            | 4.05 ± 0.49*            | 3.81 ± 0.73*                | 2.31 ± 0.20                        | 3.55 ± 0.34                        |
| Threonine (μmol/mg)                                    | 1.43 ± 0.13            | 2.32 ± 0.30*            | 2.15 ± 0.21*                | 1.50 ± 0.14 <sup>†‡</sup>          | 1.90 ± 0.22                        |
| Tryptophan (peak area/mg)                              | 446236.09 ± 22344.97   | 370167.99 ± 16763.93*   | 360416.70 ± 26965.90*       | 436962.22 ± 15768.61 <sup>†‡</sup> | 438380.32 ± 20135.02 <sup>†‡</sup> |
| Tyrosine (nmol/mg)                                     | 569.52 ± 49.30         | 717.67 ± 47.80*         | 745.72 ± 17.18*             | 587.12 ± 49.56 <sup>†‡</sup>       | 594.36 ± 19.88 <sup>†‡</sup>       |
| Valine (nmol/mg)                                       | 567.78 ± 38.64         | 803.59 ± 107.30*        | 726.75 ± 32.56*             | 662.34 ± 48.20 <sup>†</sup>        | 550.50 ± 14.91 <sup>†‡</sup>       |
| <b><u>Glycolysis metabolites</u></b>                   |                        |                         |                             |                                    |                                    |
| Glucose (μmol/mg)                                      | 21.58 ± 1.54           | 23.99 ± 1.48            | 21.16 ± 1.24                | 20.25 ± 1.48                       | 22.10 ± 0.82                       |
| Glucose-6-phosphate and Fructose-6-phosphate (μmol/mg) | 29.78 ± 5.33           | 7.83 ± 0.77*            | 4.81 ± 1.47*                | 8.41 ± 0.43*                       | 8.42 ± 3.54*                       |
| Fructose-1,6-bisphosphate (μmol/mg)                    | 11.31 ± 0.44           | 7.95 ± 1.71*            | 7.41 ± 0.81*                | 7.44 ± 0.50*                       | 7.72 ± 0.89*                       |
| Glyceraldehyde-3-phosphate (peak area/mg)              | 1149563.09 ± 210320.63 | 2262417.82 ± 133310.51* | 2156384.85 ± 219666.05*     | 2223418.29 ± 127952.28*            | 2005588.07 ± 211867.22*            |
| 3-Phosphoglycerate and 2-Phosphoglycerate (μmol/mg)    | 1.01 ± 0.05            | 1.23 ± 0.05*            | 1.18 ± 0.03*                | 1.27 ± 0.08*                       | 1.22 ± 0.05*                       |
| Lactate (μmol/mg)                                      | 1.12 ± 0.07            | 1.07 ± 0.14             | 1.20 ± 0.12                 | 1.22 ± 0.22                        | 1.19 ± 0.11                        |

| <b><u>Palmitic acid, oleic acid, and their long-chain acylcarnitine intermediates</u></b> |                          |                         |                         |                        |                            |
|-------------------------------------------------------------------------------------------|--------------------------|-------------------------|-------------------------|------------------------|----------------------------|
| Palmitic acid (nmol/mg)                                                                   | 163.62 ± 12.15           | 171.40 ± 40.17          | 140.61 ± 11.23          | 167.58 ± 8.93          | 131.06 ± 12.20             |
| Oleic acid (μmol/mg)                                                                      | 6.31 ± 0.74              | 6.02 ± 1.50             | 6.27 ± 0.23             | 7.05 ± 0.39            | 6.64 ± 1.32                |
| Palmitoylcarnitine (nmol/mg)                                                              | 21.36 ± 2.29             | 3.85 ± 1.26*            | 5.92 ± 0.21*            | 2.33 ± 0.17*           | 12.80 ± 1.16*†§            |
| Oleoylcarnitine (peak area/mg)                                                            | 26990358.69 ± 3486281.34 | 3449712.84 ± 888546.52* | 5067101.91 ± 448705.78* | 1352536.00 ± 11540.64* | 11562165.25 ± 897114.26*†§ |
| <b><u>Medium-chain acylcarnitine intermediates of palmitic acid and oleic acid</u></b>    |                          |                         |                         |                        |                            |
| Hexanoylcarnitine (pmol/mg)                                                               | 186.87 ± 16.24           | 182.53 ± 15.80          | 211.59 ± 61.90          | 75.70 ± 4.29*†‡        | 184.52 ± 17.66§            |
| Octanoylcarnitine (pmol/mg)                                                               | 253.44 ± 39.45           | 324.89 ± 79.14          | 269.99 ± 42.94          | 80.09 ± 7.56*†‡        | 253.65 ± 73.76§            |
| Decanoyl carnitine (pmol/mg)                                                              | 333.59 ± 61.71           | 280.22 ± 80.06          | 279.10 ± 74.79          | 69.00 ± 2.80*†‡        | 298.37 ± 51.43§            |
| Lauroylcarnitine (pmol/mg)                                                                | 172.94 ± 28.75           | 165.79 ± 44.11          | 154.99 ± 22.52          | 37.34 ± 5.73*†‡        | 170.22 ± 37.23§            |
| Myristoylcarnitine (pmol/mg)                                                              | 1101.11 ± 241.96         | 1121.44 ± 285.55        | 986.28 ± 201.77         | 233.67 ± 34.69*†‡      | 1029.34 ± 158.27           |
| Dodecenoylcarnitine (peak area/mg)                                                        | 46273.97 ± 8704.40       | 45028.82 ± 7009.65      | 42555.54 ± 9064.68      | 23782.81 ± 5348.33*†‡  | 43608.60 ± 5978.48§        |
| Tetradecenoylcarnitine (peak area/mg)                                                     | 138797.67 ± 30194.18     | 161178.77 ± 33 445.36   | 129747.16 ± 15062.47    | 18667.34 ± 628.54*†‡   | 143268.78 ± 18573.15§      |
| <b><u>Adenosine diphosphate (ADP) and Adenosine triphosphate (ATP)</u></b>                |                          |                         |                         |                        |                            |
| ADP (peak area/mg)                                                                        | 496158.52 ± 70121.76     | 509917.79 ± 63914.36    | 493816.35 ± 44607.58    | 478670.27 ± 45780.96   | 565403.39 ± 71936.61       |
| ATP (μmol/mg)                                                                             | 7.81 ± 2.39              | 3.71 ± 0.38*            | 3.43 ± 0.38*            | 7.53 ± 0.53†‡          | 3.98 ± 0.42§               |

Data are reported as mean ± SEM. n = 6 per group. D-gal = D-galactose induced premature aging, D-gal with EX = D-gal receiving exercise, D-gal with CR = D-gal receiving caloric restriction. \* p <0.05 when compared to Young adult, † p <0.05 when compared to Natural aging, ‡ p <0.05 when compared to D-gal, § p <0.05 when compared to D-gal with EX.

### Supplementary Figure S1. Serum testosterone level

Data are reported as mean  $\pm$  SEM. n=6 per group

D-gal = D-galactose-induced premature aging

\* p <0.05 when compared to young adult, † p <0.05 when compared to natural aging

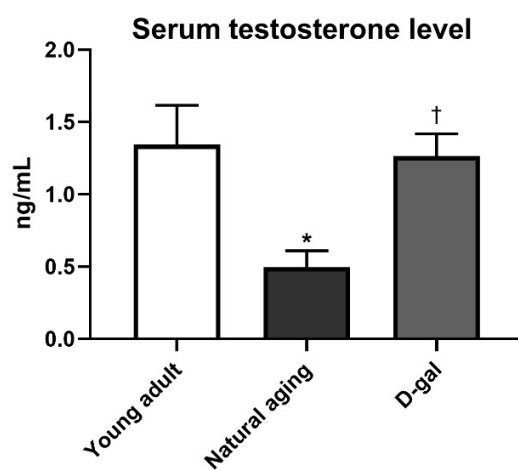

Supplement: s1 [file s1]
